# Supplementary material for: A simple preparation method of epoxy resin/silica nanocomposite for Tg loss materialElectronic supplementary information (ESI) available: infrared spectrum of silica directly obtained from TEOS and acetic anhydride in autoclave, SEM image of Sample 3-5, 1H NMR spectra of DGEBA-1, DGEBA-3, allyl-DGEBA-3, Si-DGEBA-3, hydridodimethylsilyloxy-POSS and POSS-DGEBA-3. See http://www.rsc.org/suppdata/jm/b3/b315474b/
Source: Royal Society of Chemistry journal article supplement (doi:10.1039/b315474b), 2004-01-01
Supplement: b315474b.doc [file b315474b.doc]

**Supplementary Data**

1) Infrared spectrum of silica directly obtained from TEOS and acetic anhydride in autoclave.

2) SEM image of **Sample 3-5**

3) 1H NMR spectra of **DGEBA-1**, **DGEBA-3**, **Allyl-DGEBA-3**, **Si-DGEBA-3**, Hydridodimethylsilyloxy-POSS and **POSS-DGEBA-3**.

----------------------------

1) Infrared spectrum of silica directly obtained from TEOS and acetic anhydride in autoclave.

A typical spectrum of silica was observed.

2) SEM image of **Sample 3-5**.


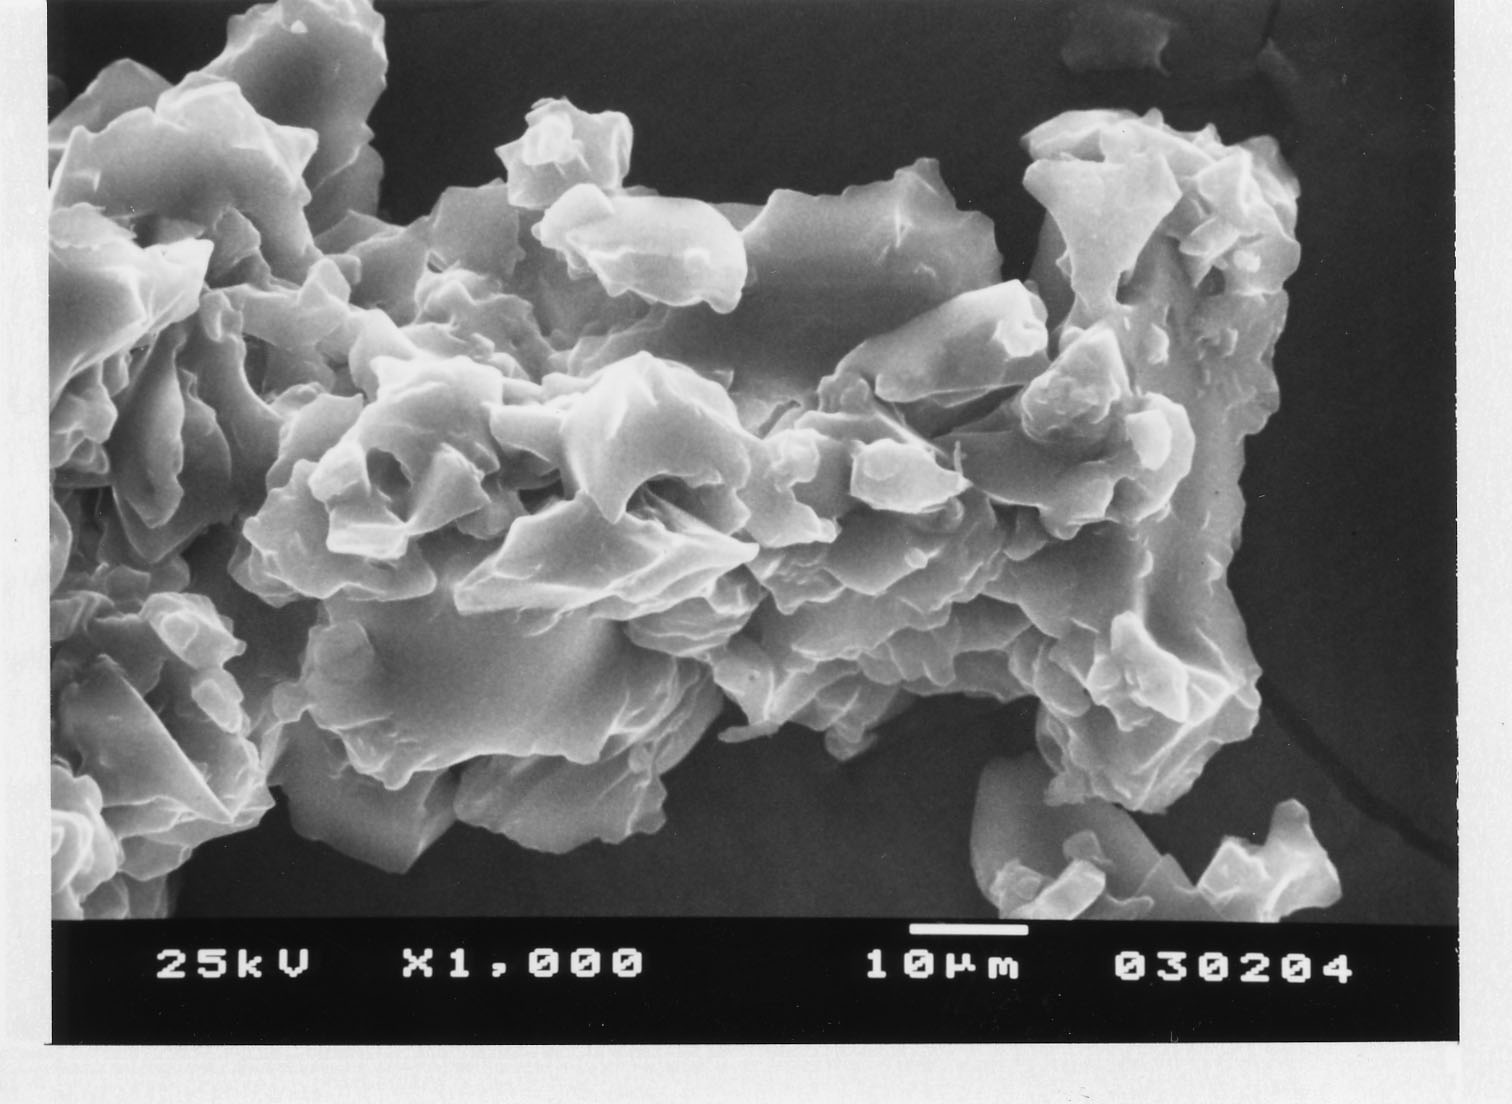
 ×1,000


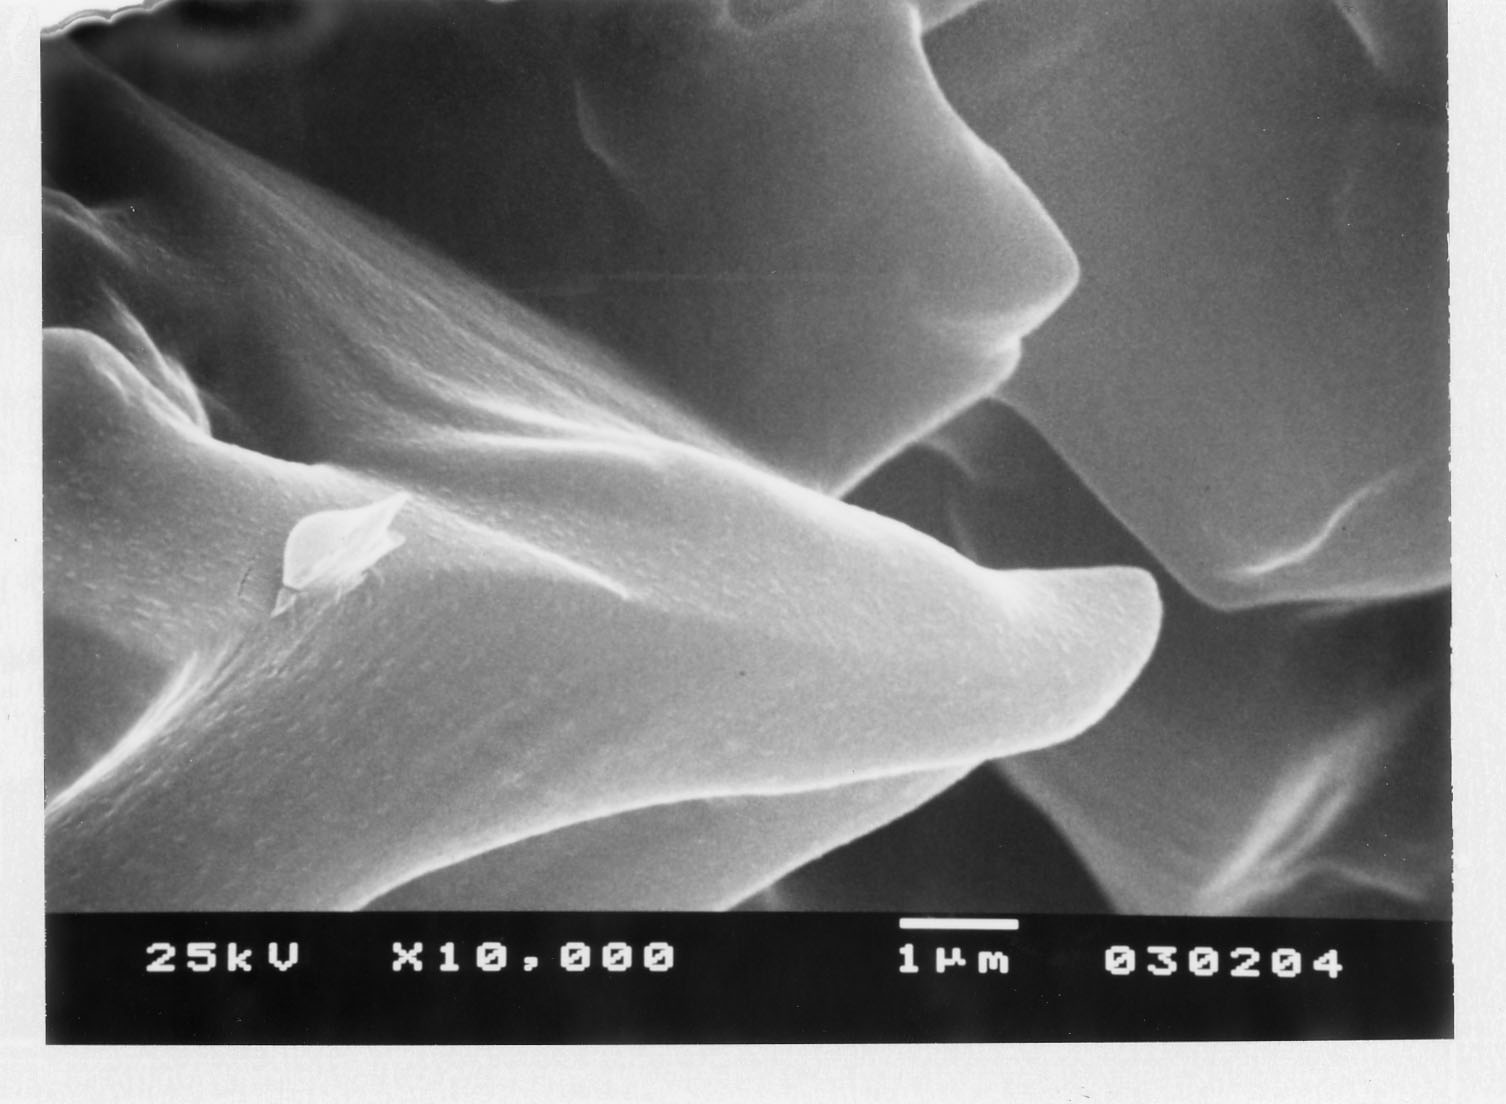
×10,000

These SEM images were obtained by JEOL JSM-5200 scanning microscope apparatus.

3) 1H NMR spectra of **DGEBA-1**, **DGEBA-3**, **Allyl-DGEBA-3** and **Si-DGEBA-3**.
